# Supplementary material for: Climate Change Impacts on Rainfed Maize Yields in Kansas: Statistical vs. Process-Based Models
Source: MDPI journal article supplement (doi:10.3390/agronomy13102571), 2023-10-06
Supplement: s1 [file s1]

# Supplementary Figures

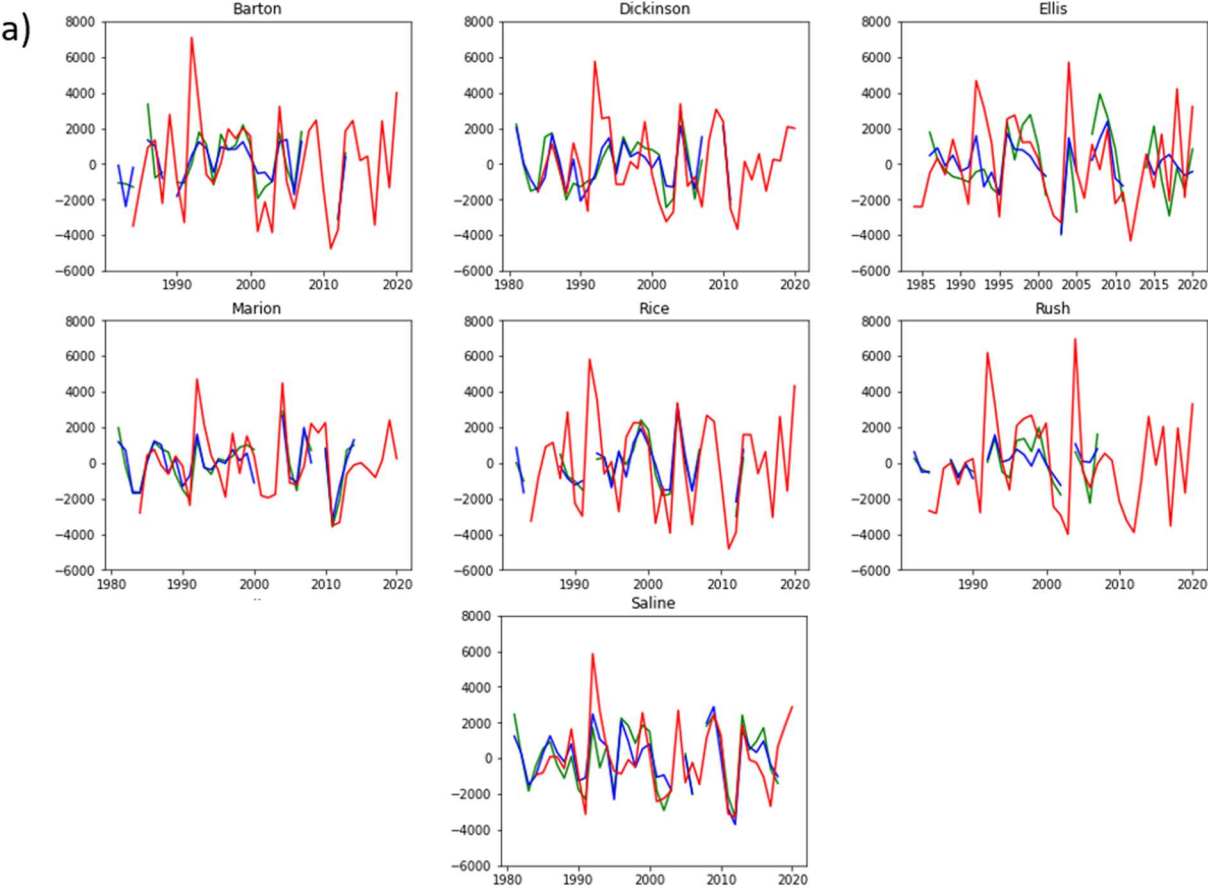

b)

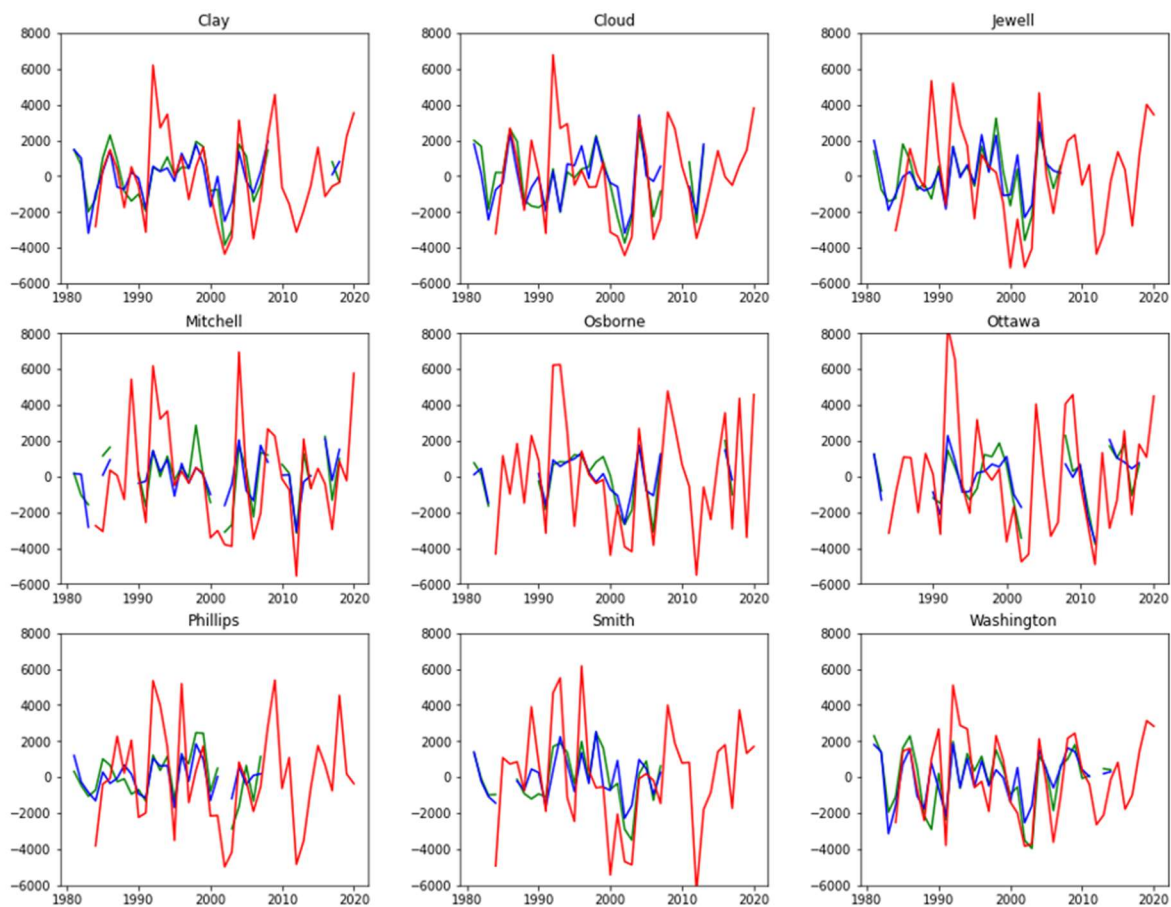

c)

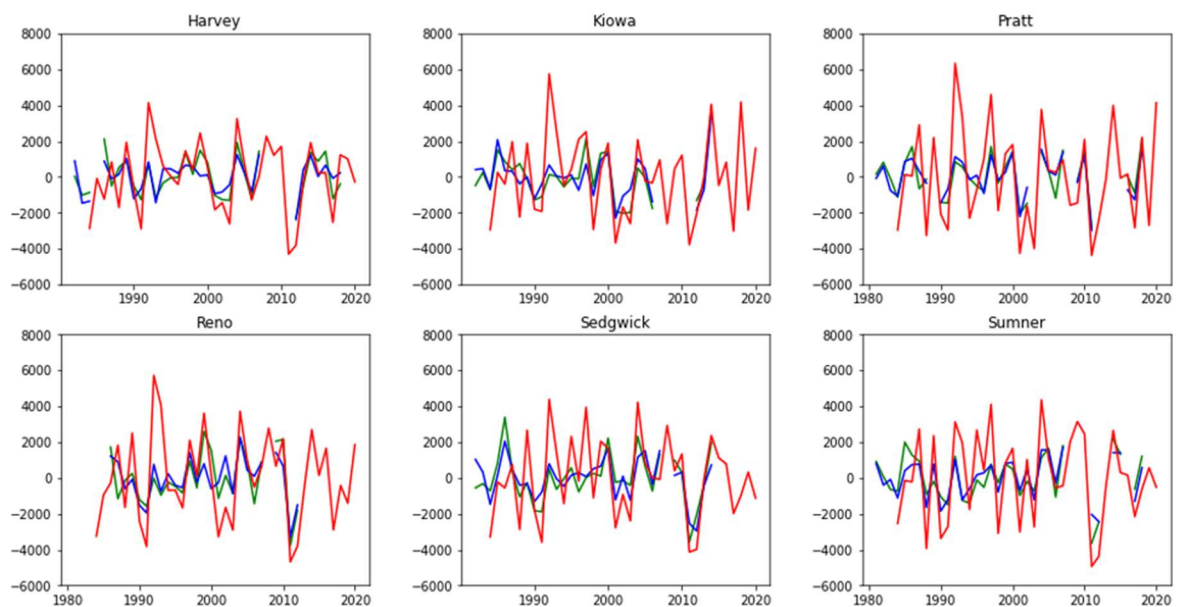

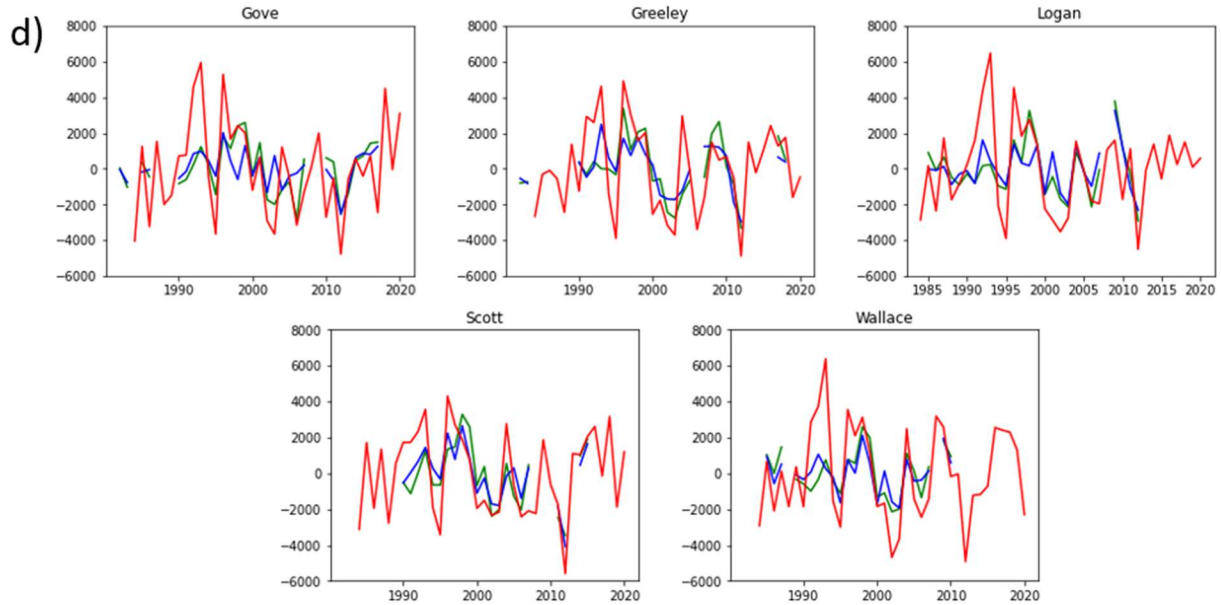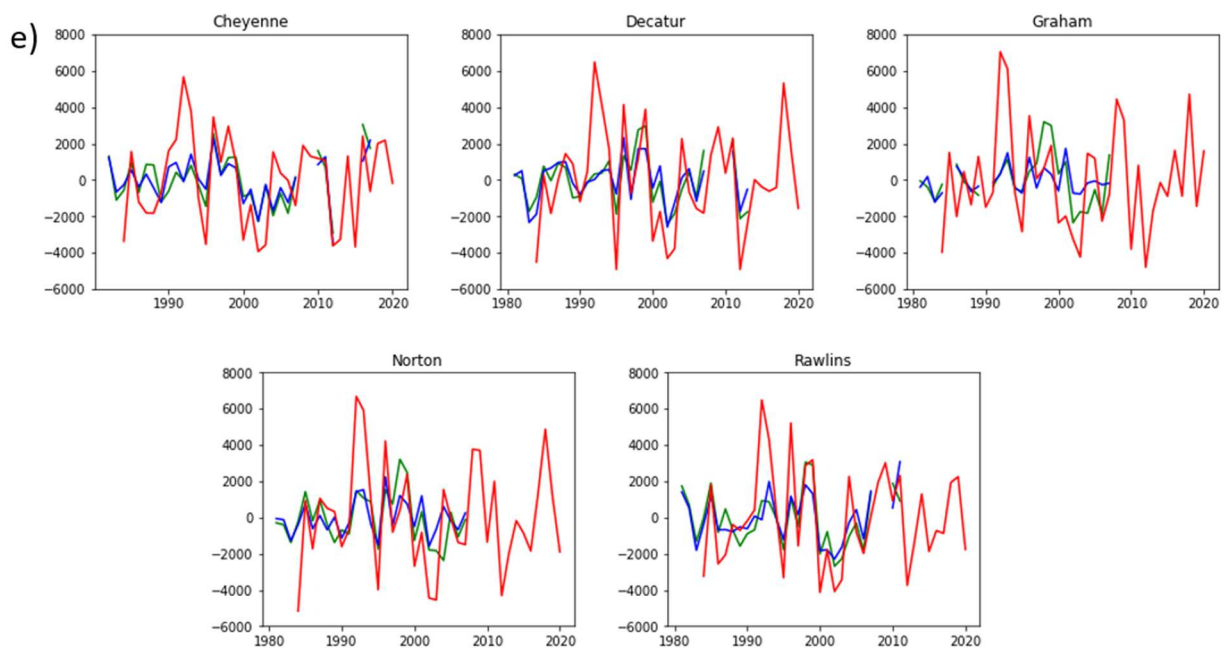

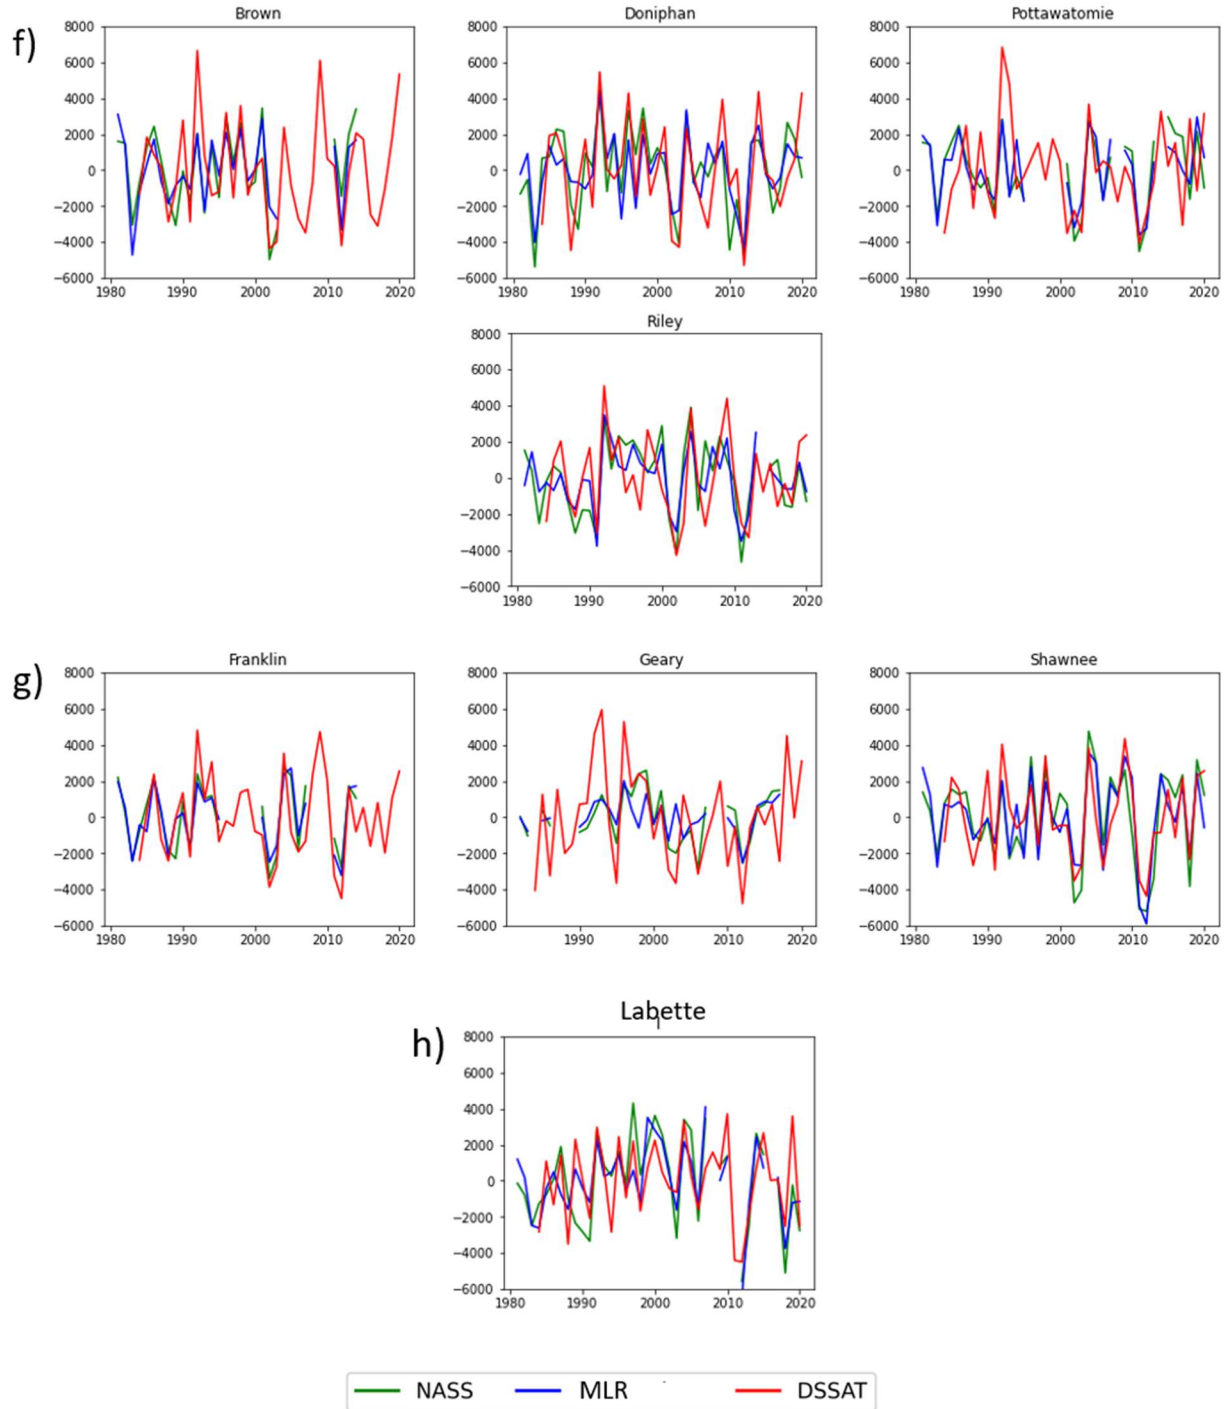

**Figure S1.** Time series of observed (green) and predicted yield from models (simulated yield from DSSAT in red, predicted yield from MLR in blue) where y-axis represents detrended predicted yield (a) Central, (b) North Central, (c) South Central, (d) West Central, (e) North Western, (f) North Eastern, (g) Eastern Central, (h) South Eastern regions in Kansas.
